# Supplementary material
Source: PubMed Central journal article supplement (PMC298743)
Supplement: pnas_0336385100_1.pdf [file pnas_0336385100_1.pdf]

Supporting information for Yoo and Desiderio (2003) *Proc. Natl. Acad. Sci. USA*,  
10.1073/pnas.0336385100.

**Table 1. Sequences of oligonucleotide primers**

|               |                                 |
|---------------|---------------------------------|
| <i>Adfp</i>   | 5'-GATAATGCCATCACCAAGTCGG-3'    |
|               | 5'-CTCACCAGCCAGGTAAGAGAACTC-3'  |
| <i>Cd63</i>   | 5'-TTGGTGTAGCGGTTTCAGGTT G-3'   |
|               | 5'-CCTCCACAAAAGCAATGCC-3'       |
| <i>Col4a1</i> | 5'-TTCCCTGGTAGTCGTGGAGACATC-3'  |
|               | 5'-AAGTCCTTGAGAGCCTTTATCGC-3'   |
| <i>Gro1</i>   | 5'-CAAACCGAAGTCATAGCCACACTC-3'  |
|               | 5'-CAAATGTCCAAGGGAAGCGTC-3'     |
| <i>Hif1a</i>  | 5'-GCTTGGTGCTGATTTGTGAACC-3'    |
|               | 5'-AAGGTAAAGGAGACATTGCCAGG-3'   |
| <i>Il17r</i>  | 5'-CCTCATCACACTCATCGCCATTC-3'   |
|               | 5'-TTGCCACTCCTGGAACCT AAGC-3'   |
| <i>Lbp</i>    | 5'-AATCACCGCTCTCCAGTTGCTAC-3'   |
|               | 5'-CCACTCAGACCCATCTTTCTTCTTG-3' |
| <i>Lmp7</i>   | 5'-CACAACCACACTCGCCTTCAAG-3'    |
|               | 5'-GACATCGGAACTCTCCACTTTCAC-3'  |
| <i>Mama</i>   | 5'-TGGACCAGTGGAGCACAGAAAC-3'    |
|               | 5'-AGTGAGGTAGAAGGGGCGTATGAC-3'  |
| <i>Np-b</i>   | 5'-CGAAGATTATGAGACCACTGCCAAG-3' |
|               | 5'-AAACCAAAGACACGGAGCCCAC-3'    |
| <i>Tapbp</i>  | 5'-AGGAAAAGGCTACGGCATTG-3'      |
|               | 5'-GGAGAAGAAGAGAAGAAGGCTGTTG-3' |
| <i>Vcam</i>   | 5'-GACTTGAAATGCCTGTGAAGATGG-3'  |
|               | 5'-TTGAAGCCTTGTGGAGGGATG-3'     |
| <i>Xdh</i>    | 5'-CCCTCATCTTCTTTATTCAACCCG-3   |
|               | 5'-CACTGGTCACCTTGGCAATGTC-3'    |
