# Supplementary material
Source: PubMed Central journal article supplement (PMC298743)
Supplement: pnas_0336385100_2.pdf [file pnas_0336385100_2.pdf]

**Table 3. LPS-responsive genes of known or inferred function**

| Gene    | Description                                                        | Functional category     | Fold change* |
|---------|--------------------------------------------------------------------|-------------------------|--------------|
| gjb1    | Gap junction membrane channel protein beta 1                       | Cell-Cell communication | 0.2          |
| cldn3   | claudin 3                                                          | Cell-Cell communication | 0.27         |
| ceacam1 | CEA-related cell adhesion molecule 1 (C-CAM)                       | Cell-Cell communication | 0.52         |
| itgb1   | Integrin beta 1 (fibronectin receptor beta)                        | Cell-Cell communication | 0.7          |
| sparc   | secreted acidic cysteine rich glycoprotein                         | Cell-Cell communication | 3            |
| ninj1   | Ninjurin 1                                                         | Cell-Cell communication | 3.1          |
| gja1    | Gap junction membrane channel protein alpha 1                      | Cell-Cell communication | 5            |
| itgb4bp | Integrin beta 4 binding protein                                    | Cell-Cell communication | 10           |
| vcam1   | vascular cell adhesion molecule-1 mRNA                             | Cell-Cell communication | 10           |
| cldn1   | claudin 1                                                          | Cell-Cell communication | D            |
| cdh2    | cadherin 2                                                         | Cell-Cell communication | D            |
| icam1   | Intercellular adhesion molecule 1 (ICAM-1)                         | Cell-Cell communication | I            |
| vamp8   | Vesicle-associated membrane protein 8                              | Cellular processes      | 0.14         |
| abcd3   | ATP-binding cassette, sub-family D (ALD), member 3                 | Cellular processes      | 0.22         |
| cideb   | Cell death-inducing DNA fragmentation factor, alpha subunit-like e | Cellular processes      | 0.26         |
| calt    | caltractin, calcium binding protein                                | Cellular processes      | 0.26         |
| cbx3    | Chromobox homolog 3 (Drosophila HP1 gamma)                         | Cellular processes      | 0.26         |
| ccni    | cyclin I                                                           | Cellular processes      | 0.27         |
| orc4    | Origin recognition complex, subunit 4                              | Cellular processes      | 0.29         |
| mcm3ap  | Minichromosome maintenance deficient (S. cerevisiae) 3-associat    | Cellular processes      | 0.3          |
| M29260  | histone 1-0                                                        | Cellular processes      | 0.3          |
| pex13   | Peroxisomal biogenesis factor 13                                   | Cellular processes      | 0.3          |
| cdc42   | cell division cycle 42 homolog (S. cerevisiae)                     | Cellular processes      | 0.31         |
| ccng2   | Cyclin G2                                                          | Cellular processes      | 0.32         |
| gm2a    | GM2 ganglioside activator protein                                  | Cellular processes      | 0.33         |
| pxmp2   | peroxisome membrane protein (PMP22) gene                           | Cellular processes      | 0.35         |
| pex7    | Peroxisome biogenesis factor 7                                     | Cellular processes      | 0.37         |
| cradd   | CASP2 and RIPK1 domain containing adaptor with death domain        | Cellular processes      | 0.42         |
| rab9    | RAB9, member RAS oncogene family                                   | Cellular processes      | 0.43         |
| lamp2   | Lysosomal membrane glycoprotein 2                                  | Cellular processes      | 0.46         |
| vamp8   | Vesicle-associated membrane protein 8                              | Cellular processes      | 0.5          |
| rab11b  | RAB11b, member ras oncogene family                                 | Cellular processes      | 0.53         |
| lamp2   | lysosomal membrane glycoprotein-type B                             | Cellular processes      | 0.58         |
| rab11a  | RAB11a, member RAS oncogene family                                 | Cellular processes      | 0.58         |
| spc18   | Signal peptidase complex (18kD)                                    | Cellular processes      | 0.6          |
| xpa     | xeroderma pigmentosum, complementation group A                     | Cellular processes      | 0.7          |
| dpp7    | Dipeptidyl peptidase 7                                             | Cellular processes      | 0.7          |
| pex14   | Peroxisomal biogenesis factor 14                                   | Cellular processes      | 0.82         |
| psap    | prosaposin (psap\SGP-1) gene                                       | Cellular processes      | 0.84         |
| supt4h2 | suppresor of Ty4 homolog 2                                         | Cellular processes      | 1.5          |
| emd     | emerin                                                             | Cellular processes      | 1.5          |
| bcl2l   | Bcl-xL                                                             | Cellular processes      | 3            |
| mdm2    | transformed mouse 3T3 cell double minute 2                         | Cellular processes      | 3            |
| apex    | apurinic/aprimidinic endonuclease                                  | Cellular processes      | 3            |
| bax     | Bcl2-associated X protein                                          | Cellular processes      | 4            |
| tieg    | TGF beta inducible early growth response, transcription factor     | Cellular processes      | 5            |
| h3f3b   | Histone H3.3 (AA 1 - 136)                                          | Cellular processes      | 5.7          |
| cd63    | CD63 antigen                                                       | Cellular processes      | 6            |
| smarcb1 | SWI/SNF related, matrix associated, actin dependent regulator of   | Cellular processes      | 6.1          |

|            |                                                                          |                      |      |
|------------|--------------------------------------------------------------------------|----------------------|------|
| mlp        | MARCKS-like protein                                                      | Cellular processes   | 8.7  |
| ifi204     | Interferon activated gene 204                                            | Cellular processes   | 13   |
| btg3       | B-cell translocation gene 3                                              | Cellular processes   | 13   |
| flot1      | caveolae-associated integral membrane protein, Flotillin 1               | Cellular processes   | 22   |
| h1f2       | histone H1 gene                                                          | Cellular processes   | D    |
| mpg        | N-methylpurine-DNA glycosylase                                           | Cellular processes   | D    |
| gdi2       | Guanosine diphosphate (GDP) dissociation inhibitor 2                     | Cellular processes   | D    |
| impnb      | importin beta                                                            | Cellular processes   | D    |
| asgr2      | asialoglycoprotein receptor 2                                            | Cellular processes   | D    |
| bag3       | Bcl2-associated athanogene 3                                             | Cellular processes   | I    |
| birc3      | Baculoviral IAP (inhibitor of apoptosis protein) repeat-containing 3     | Cellular processes   | I    |
| hist1      | Histone gene complex 1                                                   | Cellular processes   | I    |
| exo70      | Exocyst component protein 70 kDa homolog ( <i>S. cerevisiae</i> )        | Cellular processes   | I    |
| mcrs1      | Microspherule protein 1                                                  | Cellular processes   | I    |
| plscr2     | phospholipid scramblase 2                                                | Cellular processes   | 2.8  |
| tubb2      | Tubulin, beta 2                                                          | Cytoskeleton         | 0.16 |
| diap1      | Diaphanous homolog 1 ( <i>Drosophila</i> )                               | Cytoskeleton         | 0.22 |
| myo1b      | Myosin I                                                                 | Cytoskeleton         | 0.26 |
| myhca      | myosin heavy chain                                                       | Cytoskeleton         | 0.33 |
| dncic1     | Dynein, cytoplasmic, intermediate chain 1                                | Cytoskeleton         | 0.44 |
| tuba6      | Tubulin alpha 6                                                          | Cytoskeleton         | 0.66 |
| actx       | A-X actin                                                                | Cytoskeleton         | 2    |
| actg2      | smooth muscle gamma-actin gene                                           | Cytoskeleton         | 2    |
| actb       | cytoplasmic beta-actin                                                   | Cytoskeleton         | 2.5  |
| actb       | cytoplasmic beta-actin                                                   | Cytoskeleton         | 2.5  |
| dsn        | destrin, sid23p                                                          | Cytoskeleton         | 2.5  |
| actb       | cytoplasmic beta-actin                                                   | Cytoskeleton         | 2.5  |
| acta1      | skeletal alpha-actin gene                                                | Cytoskeleton         | 2.5  |
| map1lc3    | microtubule associated protein 1 light chain 3                           | Cytoskeleton         | 3    |
| tmsb4x     | thymosin beta 4; actin monomer binding protein                           | Cytoskeleton         | 3.1  |
| actc1      | Actin, alpha, cardiac                                                    | Cytoskeleton         | 3.4  |
| actb       | cytoplasmic beta-actin                                                   | Cytoskeleton         | 3.5  |
| actg       | gamma-actin                                                              | Cytoskeleton         | 4.1  |
| map11c3    | Microtubule-associated protein 1 light chain 3                           | Cytoskeleton         | 4.4  |
| myh9       | Myosin heavy chain IX                                                    | Cytoskeleton         | 4.5  |
| tmsb10     | Thymosin, beta 10                                                        | Cytoskeleton         | 5.2  |
| klc1       | kinesin light chain 1 (Klc1)                                             | Cytoskeleton         | D    |
| cof2       | cofilin 2                                                                | Cytoskeleton         | D    |
| fkbp4      | FK506 binding protein 4 (59 kDa)                                         | Defense and immunity | 0.1  |
| fkbp4      | FK506 binding protein 4 (59 kDa)                                         | Defense and Immunity | 0.13 |
| serpind1   | heparin cofactor II precursor (HCII), serpin (serine protease inhibitor) | Defense and immunity | 0.14 |
| klkb1      | plasma kallikrein (PK)                                                   | Defense and Immunity | 0.17 |
| prealbumin | prealbumin                                                               | Defense and immunity | 0.2  |
| sdf1       | Stromal cell derived factor 1                                            | Defense and Immunity | 0.24 |
| tfpi2      | placental protein 5 / tissue factor pathway inhibitor-2                  | Defense and Immunity | 0.29 |
| c9         | C9, complement component 9                                               | Defense and Immunity | 0.29 |
| f7         | coagulation factor VII                                                   | Defense and Immunity | 0.3  |
| lyzs       | lysozyme                                                                 | Defense and immunity | 0.31 |
| f13b       | Coagulation factor XIII, beta subunit                                    | Defense and Immunity | 0.32 |
| itih1      | inter-alpha-trypsin inhibitor H1 chain.                                  | Defense and Immunity | 0.33 |
| daf1       | decay accelerating factor 1                                              | Defense and immunity | 0.47 |
| f5         | Coagulation factor V                                                     | Defense and immunity | 0.5  |
| fkbp9      | FK506 binding protein 9                                                  | Defense and immunity | 0.62 |

|          |                                                        |                      |     |
|----------|--------------------------------------------------------|----------------------|-----|
| fkbp1a   | FK506 binding protein 1a (12 kDa)                      | Defense and immunity | 0.8 |
| cd52     | CD52 antigen, B7                                       | Defense and immunity | 0.8 |
| aip      | Aryl-hydrocarbon receptor-interacting protein          | Defense and immunity | 1.1 |
| C1r      | complement component 1, r subcomponent                 | Defense and immunity | 1.5 |
| scya19   | small inducible cytokine A19                           | Defense and immunity | 1.5 |
| lat      | linker for activation of T cells                       | Defense and immunity | 1.5 |
| Psme2    | proteasome activator PA28 beta subunit                 | Defense and immunity | 2   |
| ctss     | cathepsin S                                            | Defense and immunity | 2   |
| c1r      | Complement component 1, r subcomponent                 | Defense and immunity | 2   |
| serping1 | C1 inhibitor                                           | Defense and immunity | 2   |
| h2-d1    | H-2 histocompatibility antigen fragment (aa 44-358)    | Defense and immunity | 2.5 |
| crp      | C-reactive protein, petaxin related                    | Defense and immunity | 2.9 |
| xbp1     | X-box binding protein 1                                | Defense and immunity | 3   |
| psme1    | PA28 alpha subunit                                     | Defense and immunity | 3   |
| ctsc     | Cathepsin C (dipeptidyl peptidase)                     | Defense and immunity | 3   |
| spp1     | Secreted phosphoprotein 1                              | Defense and immunity | 3.3 |
| abca1    | ATP-binding cassette, sub-family A (ABC1), member 1    | Defense and immunity | 3.5 |
| klkbop   | kallikrein binding protein                             | Defense and immunity | 3.5 |
| pfc      | Properdin factor, complement                           | Defense and immunity | 3.5 |
| spi6     | Serine protease inhibitor 6                            | Defense and immunity | 3.6 |
| H-2K-f   | MHC (A.CA/J(H-2K-f) class I antigen                    | Defense and immunity | 3.7 |
| itih4    | inter alpha-trypsin inhibitor, heavy chain 4           | Defense and immunity | 3.8 |
| slpi     | Secretory leukocyte protease inhibitor                 | Defense and immunity | 3.8 |
| lgals8   | Lectin, galactose binding, soluble 8                   | Defense and immunity | 3.9 |
| sod2     | manganese superoxide dismutase (MnSOD) gene            | Defense and immunity | 4   |
| timp3    | tissue inhibitor of metalloproteinase 3                | Defense and immunity | 4.5 |
| hif1a    | Hypoxia inducible factor 1, alpha subunit              | Defense and immunity | 4.8 |
| sap      | amyloid P component precursor                          | Defense and immunity | 4.9 |
| tapbp    | TAP binding protein, tapasin                           | Defense and immunity | 5   |
| orm1     | alpha-1 acid glycoprotein (Agp-1B), orosomuroid 1      | Defense and immunity | 5   |
| orm1     | alpha-1 acid glycoprotein (Agp-1B), orosomuroid 1      | Defense and immunity | 5   |
| spi2-rs1 | serine protease inhibitor 2.4.                         | Defense and immunity | 5   |
| hif1a    | hypoxia-inducible factor one alpha                     | Defense and immunity | 5   |
| mt2      | metallothionein 2                                      | Defense and immunity | 5.5 |
| psmb10   | proteasome subunit, beta type 10                       | Defense and immunity | 6   |
| Ppicap   | peptidylprolyl isomerase C-associated protein (Mama)   | Defense and immunity | 6.5 |
| psmb8    | proteasome subunit, beta type 8 (Lmp7)                 | Defense and immunity | 7   |
| lcn2     | Lipocalin 2                                            | Defense and immunity | 7.7 |
| lbp      | LPS-binding protein.                                   | Defense and immunity | 8   |
| mt1      | Metallothionein-I (three exons).                       | Defense and immunity | 8   |
| spi2     | Serine protease inhibitor 2                            | Defense and immunity | 9   |
| abcb2    | ATP-binding cassette, sub-family B (MDR/TAP), member 2 | Defense and immunity | 11  |
| col4a-1  | type IV collagen alpha-1                               | Defense and immunity | 12  |
| spi2     | spi2 serine proteinase inhibitor (spi2/eb4)            | Defense and immunity | 20  |
| gadd45g  | Growth arrest and DNA-damage-inducible 45 gamma        | Defense and immunity | 21  |
| fkbp5    | FK506 binding protein 5                                | Defense and immunity | 33  |
| saa1     | serum amyloid A-1                                      | Defense and immunity | 50  |
| gro1     | secretory protein KC precursor                         | Defense and immunity | 70  |
| gro1     | secretory protein KC precursor                         | Defense and immunity | 80  |
| saa2     | serum amyloid A protein isoform 2 mRNA                 | Defense and immunity | 85  |
| scyb9    | Interferon gamma induced monokine, MIG                 | Defense and immunity | 100 |
| saa3     | serum amyloid A 3 protein.                             | Defense and immunity | 100 |
| mrc1     | macrophage mannose receptor                            | Defense and Immunity | D   |

|            |                                                                      |                         |      |
|------------|----------------------------------------------------------------------|-------------------------|------|
| abcb3      | ATP-binding cassette, sub-family B (MDR/TAP), member 3               | Defense and immunity    | 1    |
| epcr       | endothelial cell activated protein C receptor                        | Defense and immunity    | 1    |
| s100a11    | S100 calcium binding protein A11 (calizzarin), EMAP                  | Defense and immunity    | 1    |
| il1b       | interleukin 1 beta                                                   | Defense and immunity    | 1    |
| saa4       | serum amyloid A                                                      | Defense and immunity    | 1    |
| lcn2       | Lipocalin 2                                                          | Defense and immunity    | 1    |
| cd14       | CD14 mRNA for myelid cell-specific leucine-rich glycoprotein.        | Defense and immunity    | 1    |
| marco      | Macrophage receptor with collagenous structure                       | Defense and immunity    | 1    |
| ctla2b     | Cytotoxic T lymphocyte-associated protein 2 beta                     | Defense and immunity    | 1    |
| spi2       | spi2 proteinase inhibitor (spi2/eb1)                                 | Defense and immunity    | 1    |
| sdca4      | Syndecan 4                                                           | Extracellular matrix    | 4.2  |
| fn1        | fibronectin                                                          | Extracellular Matrix    | 2.5  |
| col4a2     | procollagen alpha-2(IV) chain.                                       | Extracellular matrix    | 2.5  |
| col15a1    | Procollagen, type XV                                                 | Extracellular matrix    | 0.32 |
| fbn1       | Fibrillin 1                                                          | Extracellular matrix    | 0.26 |
| reln       | reelin                                                               | Extracellular matrix    | 0.13 |
| zap70      | Zeta-chain (TCR) associated protein kinase (70kD)                    | Intracellular signaling | 0.11 |
| sdf1       | stromal cell derived factor 1                                        | Intracellular signaling | 0.12 |
| tob1       | transducer of ErbB-2.1                                               | Intracellular signaling | 0.15 |
| ghr        | growth hormone receptor/binding protein precursor                    | Intracellular signaling | 0.17 |
| lifr       | Leukemia inhibitory factor receptor                                  | Intracellular signaling | 0.17 |
| lifr       | Leukemia inhibitory factor receptor                                  | Intracellular signaling | 0.21 |
| pbx1       | Pre B-cell leukemia transcription factor 1                           | Intracellular signaling | 0.21 |
| ctf1       | Cardiotrophin-1                                                      | Intracellular signaling | 0.23 |
| nr1h3      | Nuclear receptor subfamily1, Constitutive Androstane Receptor        | Intracellular signaling | 0.25 |
| csf1r      | Colony stimulating factor 1 receptor                                 | Intracellular signaling | 0.26 |
| hnf6       | hepatocyte nuclear factor 6 (one cut domain family member 1)         | Intracellular signaling | 0.27 |
| nr1h3      | Nuclear receptor subfamily1, Constitutive Androstane Receptor        | Intracellular signaling | 0.28 |
| traf3      | Tnf receptor-associated factor 3                                     | intracellular signaling | 0.29 |
| sdf1       | stromal cell derived factor 1                                        | Intracellular signaling | 0.3  |
| pten       | Protein-tyrosine phosphatase and tensin homolog                      | Intracellular signaling | 0.3  |
| tfdp1      | DRTF-polypeptide-1, transcriptiona factor DP1                        | Intracellular signaling | 0.4  |
| ppara      | Peroxisome proliferator activated receptor alpha                     | Intracellular signaling | 0.45 |
| tfdp1      | DRTF-polypeptide-1, transcriptiona factor DP1                        | Intracellular signaling | 0.5  |
| ms4a2      | Membrane-spanning 4-domains, subfamily A, member 2 (CD20)            | Intracellular signaling | 0.53 |
| ncoa4      | Nuclear receptor coactivator 4                                       | Intracellular signaling | 0.53 |
| cebpb1-rs1 | CCAAT/enhancer binding protein alpha (C/EBP), related sequence       | Intracellular signaling | 0.53 |
| cbfb       | Core binding factor beta                                             | Intracellular signaling | 0.53 |
| pira3      | Paired-Ig-like receptor A3                                           | Intracellular signaling | 0.55 |
| sp3        | Trans-acting transcription factor 3                                  | Intracellular signaling | 0.56 |
| ctbp1      | C-terminal binding protein 1                                         | Intracellular signaling | 0.7  |
| rxra       | retinoid X receptor-alpha (mRXR-alpha).                              | Intracellular signaling | 0.8  |
| akap       | A kinase anchor protein; targeted to outer membrane of mitochor      | Intracellular signaling | 0.8  |
| edg3       | endothelial differentiation, sphingolipid G-protein-coupled receptor | Intracellular signaling | 0.9  |
| syk        | protein tyrosine kinase                                              | Intracellular signaling | 1.5  |
| csf1r      | c-fms protein precursor (AA -19 to 957)                              | Intracellular signaling | 2    |
| sra1       | Steroid receptor RNA activator 1                                     | Intracellular signaling | 2    |
| klf3       | Kruppel-like factor 3                                                | Intracellular signaling | 2    |
| rab18      | ras-related protein                                                  | Intracellular signaling | 2.5  |
| nab1       | transcriptional repressor                                            | Intracellular signaling | 2.5  |
| lnpp1      | Inositol polyphosphate-1-phosphatase                                 | Intracellular signaling | 3    |
| rela       | Transcription factor p65 (NF-kappa-B p65), V-rel reticuloendothe     | Intracellular signaling | 3    |
| madh1      | homology of hSmad1;bsp-1, hMAD1, JV4-1 and MADR1                     | Intracellular signaling | 3    |

|               |                                                                      |                         |      |
|---------------|----------------------------------------------------------------------|-------------------------|------|
| junD1         | Jun proto-oncogene related gene d1                                   | Intracellular signaling | 3.1  |
| lcp2          | Lymphocyte cytosolic protein 2 (Slp-76)                              | intracellular signaling | 3.1  |
| il1r2         | Interleukin 1 receptor, type II                                      | Intracellular signaling | 3.2  |
| Stat3         | Signal transducer and activator of transcription 3                   | Intracellular signaling | 3.3  |
| tyrobp        | TYRO protein tyrosine kinase binding protein (DAP12)                 | intracellular signaling | 3.3  |
| bhlhb2        | Basic helix-loop-helix domain containing, class B2                   | Intracellular signaling | 3.4  |
| nek7          | NIMA (never in mitosis gene a)-related expressed kinase 7            | Intracellular signaling | 3.6  |
| tbk1          | TANK-binding kinase 1                                                | Intracellular signaling | 3.9  |
| tnfrsf1b      | tumor necrosis factor receptor superfamily, member 1b                | Intracellular signaling | 3.9  |
| ptp4a1        | protein tyrosine phosphatase, PRL1                                   | Intracellular signaling | 4    |
| AW046627      | serine threonine kinase pim3                                         | Intracellular signaling | 4.2  |
| ptpn2         | Protein tyrosine phosphatase, non-receptor type 2                    | Intracellular signaling | 4.3  |
| osmr          | oncostatin receptor                                                  | Intracellular signaling | 4.6  |
| cebpb         | CCAAT/enhancer binding protein (C/EBP), bet                          | Intracellular signaling | 4.6  |
| egfr          | Epidermal growth factor receptor                                     | Intracellular signaling | 4.8  |
| cish2         | suppressor of cytokine signalling-2 (SOCS-2)                         | Intracellular signaling | 4.8  |
| atf3          | activating transcription factor 3                                    | Intracellular signaling | 4.9  |
| il17r         | interleukin 17 receptor                                              | Intracellular signaling | 5    |
| mail          | Molecule possessing ankyrin-repeats induced by lipopolysaccharide    | Intracellular signaling | 5    |
| nfil3         | nuclear factor, interleukin 3, regulated                             | Intracellular signaling | 5    |
| g3bp2-pendi   | ras-GTPase-activating protein SH3-domain binding protein             | Intracellular signaling | 5    |
| irf1          | Interferon regulatory factor 1                                       | Intracellular signaling | 5.4  |
| tnfrsf6       | Tumor necrosis factor receptor superfamily, member 6                 | Intracellular signaling | 6.4  |
| ogfr          | Opioid growth factor receptor                                        | Intracellular signaling | 6.4  |
| stat1         | signal transducer and activator of transcription 1                   | Intracellular signaling | 6.5  |
| ligp          | Interferon gamma induced GTPase                                      | Intracellular signaling | 7    |
| nfkbia        | Nuclear factor of kappa light chain gene enhancer in B-cells inhibit | Intracellular signaling | 7.4  |
| gtpi          | Interferon-g induced GTPase                                          | Intracellular signaling | 8.2  |
| litaf-pending | LPS-induced TNF-alpha factor                                         | Intracellular signaling | 9    |
| igfbp1        | insulin-like growth factor binding protein-1.                        | Intracellular signaling | 9.4  |
| gas6          | Growth arrest specific 6                                             | Intracellular signaling | 10   |
| arhb          | ras homolog B (RhoB)                                                 | Intracellular signaling | 10   |
| g3bp2-pendi   | ras-GTPase-activating protein SH3-domain binding protein             | Intracellular signaling | 10   |
| ligp          | Interferon gamma induced GTPase                                      | Intracellular signaling | 12   |
| mirf7         | interferon regulatory factor 7                                       | Intracellular signaling | 12   |
| etv6          | Ets variant gene 6 (TEL oncogene)                                    | Intracellular signaling | 12.4 |
| ifi1          | Interferon inducible protein 1                                       | Intracellular signaling | 13   |
| nfkbl1        | Nuclear factor of kappa light chain gene enhancer in B-cells 1, p1C  | Intracellular signaling | 13   |
| ll1r1         | interleukin 1 receptor precursor                                     | Intracellular signaling | 15   |
| igtp          | Interferon gamma induced GTPase                                      | Intracellular signaling | 17   |
| c/ebp delta   | transcription factor                                                 | Intracellular signaling | 20   |
| pbef          | Pre-B-cell colony-enhancing factor                                   | Intracellular signaling | 23   |
| gbp3          | homology to guanylate nucleotide binding protein 3                   | Intracellular signaling | 25   |
| tgtp          | T-cell specific GTPase                                               | Intracellular signaling | 34   |
| hegfl         | Heparin binding epidermal growth factor-like growth factor           | Intracellular signaling | D    |
| vegfb         | VEGF-related factor                                                  | Intracellular signaling | D    |
| rras          | Harvey rat sarcoma oncogene, subgroup R                              | Intracellular signaling | D    |
| gnao          | Guanine nucleotide binding protein, alpha o                          | Intracellular signaling | D    |
| jak2          | Janus kinase 2                                                       | Intracellular signaling | D    |
| AW124627      | homology to protein kinase C                                         | Intracellular signaling | D    |
| ptprf         | tyrosine phosphatase LAR                                             | Intracellular signaling | D    |
| eng           | Endoglin                                                             | Intracellular signaling | D    |
| hes6          | Hairy and enhancer of split 6                                        | Intracellular signaling | D    |

|          |                                                                 |                         |      |
|----------|-----------------------------------------------------------------|-------------------------|------|
| mafj     | V-maf musculoaponeurotic fibrosarcoma oncogene family, protein  | Intracellular signaling | D    |
| il1a     | interleukin-1 alpha                                             | Intracellular signaling | I    |
| Scya3    | Small inducible cytokine A3, MIP                                | Intracellular signaling | I    |
| fst      | Follistatin                                                     | Intracellular signaling | I    |
| mtlrp    | Motilin-related peptide                                         | Intracellular signaling | I    |
| il1rn    | interleukin 1 receptor antagonist                               | Intracellular signaling | I    |
| ralb     | V-ral simian leukemia viral oncogene homolog B (ras related)    | Intracellular signaling | I    |
| gbp2     | Interferon gamma induced GTPase                                 | Intracellular signaling | I    |
| AI854033 | Highly similar to RAS-RELATED PROTEIN RAB-21                    | Intracellular signaling | I    |
| ptpn1    | Protein tyrosine phosphatase, non-receptor type 1               | Intracellular signaling | I    |
| mfnj     | regulator of Notch signaling, Manic fringe homolog (Drosophila) | Intracellular signaling | I    |
| btg2     | B-cell translocation gene 2, antiproliferative                  | Intracellular signaling | I    |
| ikbke    | inhibitor of kappaB kinase epsilon                              | Intracellular signaling | I    |
| amd2     | S-adenosylmethionine decarboxylase.                             | Metabolism              | 0.02 |
| alas2    | Aminolevulinic acid synthase 2, erythroid                       | Metabolism              | 0.04 |
| sc5d     | Sterol-C5-desaturase homolog (lathosterol oxidase)              | Metabolism              | 0.1  |
| dbt      | acyltransferase                                                 | Metabolism              | 0.1  |
| fac12    | long chain fatty acyl CoA synthetase                            | Metabolism              | 0.1  |
| hal      | Histidine ammonia lyase, histidase                              | Metabolism              | 0.11 |
| agxt     | Alanine-glyoxylate aminotransferase                             | Metabolism              | 0.12 |
| mod1     | malate NADP oxidoreductase                                      | Metabolism              | 0.12 |
| hgd      | 2,5-dihydroxyphenylacetate oxidase; dioxygenase                 | Metabolism              | 0.13 |
| cyp3a25  | cytochrome P450, 3a25.                                          | Metabolism              | 0.13 |
| gstm3    | glutathione S-transferase (EC 2.5.1.18)                         | Metabolism              | 0.13 |
| lce      | long chain fatty acyl elongase                                  | Metabolism              | 0.14 |
| gclc     | Glutamate-cysteine ligase                                       | Metabolism              | 0.14 |
| AW123955 | homology to human glycine dehydrogenase                         | Metabolism              | 0.15 |
| ak4      | Adenylate kinase 4                                              | Metabolism              | 0.15 |
| dnase2a  | Deoxyribonuclease II alpha                                      | Metabolism              | 0.15 |
| gstm6    | glutathione S-transferase, mu6                                  | Metabolism              | 0.15 |
| sc5d     | Sterol-C5-desaturase (fungal ERG3, delta-5-desaturase) homolog  | Metabolism              | 0.16 |
| cyp7b1   | Cytochrome P450, 7b1                                            | Metabolism              | 0.16 |
| aldh1a7  | aldehyde dehydrogenase family 1, subfamily A7                   | Metabolism              | 0.17 |
| fpps     | farnesyl pyrophosphate synthase                                 | Metabolism              | 0.17 |
| fn1      | homology to fructose-bisphosphate aldolase                      | Metabolism              | 0.18 |
| uox      | urate oxidase (EC 1.7.3.3)                                      | Metabolism              | 0.18 |
| nudt9    | Nudix (nucleoside diphosphate linked moiety X)-type motif 9     | Metabolism              | 0.19 |
| mHS      | HMG CoA synthase                                                | Metabolism              | 0.2  |
| papss2   | 3'-phosphoadenosine 5'-phosphosulfate synthase 2                | Metabolism              | 0.2  |
| cryz     | Quinone oxidoreductase, Crystallin, zeta                        | Metabolism              | 0.21 |
| cyp2b10  | Cytochrome P450, 2b10, phenobarbital inducible, type b          | Metabolism              | 0.22 |
| cyp4a14  | Cytochrome P450, 4a14                                           | Metabolism              | 0.22 |
| fmo5     | flavin-containing monooxygenase 5                               | Metabolism              | 0.22 |
| fmo1     | flavin-containing monooxygenase                                 | Metabolism              | 0.22 |
| adss1    | adenylosuccinate synthetase                                     | Metabolism              | 0.22 |
| oaz2     | Ornithine decarboxylase antizyme 2                              | Metabolism              | 0.22 |
| taldo1   | transaldolase 1                                                 | Metabolism              | 0.23 |
| car3     | carbonic anhydrase III                                          | Metabolism              | 0.23 |
| eno1     | Enolase 1, alpha non-neuron                                     | Metabolism              | 0.23 |
| fpps     | farnesyl pyrophosphate synthase                                 | Metabolism              | 0.23 |
| hsd17b5  | Hydroxysteroid (17-beta) dehydrogenase 5                        | Metabolism              | 0.23 |
| cpo      | Coproporphyrinogen oxidase                                      | Metabolism              | 0.23 |
| cas1     | catalase                                                        | Metabolism              | 0.23 |

|          |                                                                           |            |      |
|----------|---------------------------------------------------------------------------|------------|------|
| spr      | Sepiapterin reductase                                                     | Metabolism | 0.24 |
| comt     | Catechol-O-methyltransferase (Comt)                                       | Metabolism | 0.24 |
| gba      | Acid beta glucosidase                                                     | Metabolism | 0.24 |
| cyp4a12  | cytochrome P450, 4a12                                                     | Metabolism | 0.24 |
| fasn     | Fatty acid synthase                                                       | Metabolism | 0.24 |
| sps2     | Selenophosphate synthetase 2                                              | Metabolism | 0.25 |
| pcmt1    | Protein-L-isoaspartate (D-aspartate) O-methyltransferase 1                | Metabolism | 0.25 |
| cals1    | carbonic anhydrase-related polypeptide.                                   | Metabolism | 0.25 |
| pcbd     | 6-pyruvoyl-tetrahydropterin synthase/dimerization cofactor of he          | Metabolism | 0.25 |
| ldlr     | Low density lipoprotein receptor                                          | Metabolism | 0.25 |
| ivd      | Isovaleryl coenzyme A dehydrogenase                                       | Metabolism | 0.25 |
| bhmt2    | Betaine-homocysteine methyltransferase 2                                  | Metabolism | 0.26 |
| lapep    | Leucine aminopeptidase                                                    | Metabolism | 0.26 |
| ugdh     | UDPGDH; NAD <sup>+</sup> -linked oxidoreductase, UDP-glucose dehydrogenas | Metabolism | 0.26 |
| cpo      | coproporphyrinogen oxidase                                                | Metabolism | 0.26 |
| faci5    | Fatty acid Coenzyme A ligase, long chain 5                                | Metabolism | 0.26 |
| hadhsc   | L-3-hydroxyacyl-Coenzyme A dehydrogenase, short chain                     | Metabolism | 0.26 |
| aadac    | Arylacetamide deacetylase (esterase)                                      | Metabolism | 0.26 |
| gsta2    | glutathione transferase (EC 2.5.1.18)                                     | Metabolism | 0.26 |
| epx1     | Epoxide hydrolase 1, microsomal                                           | Metabolism | 0.26 |
| glo2     | homology to hydroxyacyl glutathione hydrolase                             | Metabolism | 0.27 |
| adh4     | Alcohol dehydrogenase 4 (class II)                                        | Metabolism | 0.27 |
| AI182073 | homology to carbamoyl-phosphate synthase                                  | Metabolism | 0.27 |
| bhmt2    | Betaine-homocysteine methyltransferase                                    | Metabolism | 0.28 |
| pah      | phenylalanine hydroxylase (AA 1-453)                                      | Metabolism | 0.28 |
| elovl2   | Elongation of very long chain fatty acids (FEN1/Elo2, SUR4/Elo3,          | Metabolism | 0.28 |
| scd1     | stearoyl-CoA desaturase                                                   | Metabolism | 0.28 |
| idh1     | Isocitrate dehydrogenase 1 (NADP <sup>+</sup> ), soluble                  | Metabolism | 0.28 |
| gstt2    | Glutathione S-transferase, theta 2                                        | Metabolism | 0.28 |
| ass1     | argininosuccinate synthetase (EC 6.3.4.5)                                 | Metabolism | 0.28 |
| aldh3a2  | aldehyde dehydrogenase (Ald3)                                             | Metabolism | 0.3  |
| idi1     | homology to isopentenyl-diphosphate delta isomerase                       | Metabolism | 0.3  |
| hsd17b10 | Hydroxysteroid (17-beta) dehydrogenase 10                                 | Metabolism | 0.3  |
| rdh7     | Retinol dehydrogenase 7                                                   | Metabolism | 0.3  |
| fdft1    | Farnesyl diphosphate farnesyl transferase 1                               | Metabolism | 0.3  |
| gamt     | guanidinoacetate methyltransferase                                        | Metabolism | 0.3  |
| enpp2    | Ectonucleotide pyrophosphatase/phosphodiesterase 2 (autotaxin)            | Metabolism | 0.3  |
| nme1     | Expressed in non-metastatic cells 1, protein (NM23A) (nucleoside          | Metabolism | 0.3  |
| kat2     | Kynurenine aminotransferase II                                            | Metabolism | 0.31 |
| rsdr1    | Retinal short-chain dehydrogenase/reductase 1                             | Metabolism | 0.31 |
| impa1    | Inositol (myo)-1(or 4)-monophosphatase 1                                  | Metabolism | 0.31 |
| tdo2     | Tryptophan 2,3-dioxygenase                                                | Metabolism | 0.32 |
| ugt2b5   | UDP-glucuronosyltransferase 2 family, member 5                            | Metabolism | 0.32 |
| aldh1a1  | Aldehyde dehydrogenase family 1, subfamily A1                             | Metabolism | 0.32 |
| gstz1    | Glutathione transferase zeta 1 (maleylacetoacetate isomerase)             | Metabolism | 0.32 |
| adh1     | alcohol dehydrogenase                                                     | Metabolism | 0.32 |
| tst      | Thiosulfate sulfurtransferase, mitochondrial                              | Metabolism | 0.32 |
| mccc1    | Methylcrotonoyl-Coenzyme A carboxylase 1 (alpha)                          | Metabolism | 0.33 |
| aldh3a2  | Aldehyde dehydrogenase family 3, subfamily A2                             | Metabolism | 0.33 |
| fech     | ferrochelataase                                                           | Metabolism | 0.33 |
| AI853364 | homology to fatty acid desaturase 1                                       | Metabolism | 0.33 |
| mttp     | Microsomal triglyceride transfer protein                                  | Metabolism | 0.33 |
| ela1     | elastase 1                                                                | Metabolism | 0.33 |

|                |                                                                 |            |      |
|----------------|-----------------------------------------------------------------|------------|------|
| prdx5          | peroxiredoxin 5                                                 | Metabolism | 0.33 |
| scd1           | stearoyl-CoA desaturase                                         | Metabolism | 0.34 |
| agpat1         | 1-acylglycerol-3-phosphate O-acyltransferase 1                  | Metabolism | 0.34 |
| cyp4a10        | Cytochrome P450, 4a10                                           | Metabolism | 0.35 |
| tpi            | Triosephosphate isomerase                                       | Metabolism | 0.36 |
| fpgs           | Folylpolyglutamyl synthetase                                    | Metabolism | 0.37 |
| ddt            | D-dopachrome tautomerase                                        | Metabolism | 0.38 |
| cyp51          | Cytochrome P450, 51                                             | Metabolism | 0.4  |
| gsta3          | Glutathione S-transferase, alpha 3                              | Metabolism | 0.41 |
| es10           | Esterase 10                                                     | Metabolism | 0.41 |
| gdc1           | glycerol-3-phosphate dehydrogenase                              | Metabolism | 0.43 |
| pcyt1a         | Phosphate cytidyltransferase 1, choline, alpha isoform          | Metabolism | 0.46 |
| faah           | fatty acid amide hydrolase                                      | Metabolism | 0.48 |
| cte1           | Cytosolic acyl-CoA thioesterase 1                               | Metabolism | 0.48 |
| pon 1          | serum paraoxonase (Pon) mRNA                                    | Metabolism | 0.5  |
| aki3l1-pending | Adenylate kinase 3 alpha like                                   | Metabolism | 0.53 |
| acadl          | Acetyl-Coenzyme A dehydrogenase, long-chain                     | Metabolism | 0.57 |
| mlycd          | Malonyl-CoA decarboxylase                                       | Metabolism | 0.58 |
| hk1            | Hexokinase 1                                                    | Metabolism | 0.63 |
| dpm1           | Dolichol-phosphate (beta-D) mannosyltransferase 1               | Metabolism | 0.64 |
| gng3lg         | G protein gamma 3 linked gene                                   | Metabolism | 0.65 |
| ywhag          | 3-monooxygenase/tryptophan 5-monooxygenase activation protein   | Metabolism | 0.67 |
| acate3-pending | mitochondrial acyl-CoA thioesterase 3                           | Metabolism | 1.5  |
| srr            | serine racemase                                                 | Metabolism | 1.9  |
| ywhaq          | tyrosine 3-monooxygenase/tryptophan 5-monooxygenase activat     | Metabolism | 2    |
| siat9          | sialyltransferase 9                                             | Metabolism | 3    |
| ggcx           | Gamma-glutamyl carboxylase                                      | Metabolism | 3.2  |
| fabp4          | adipose fatty acid binding protein                              | Metabolism | 3.3  |
| ldh1           | Lactate dehydrogenase 1, A chain                                | Metabolism | 3.4  |
| qscn6          | Quiescin Q6                                                     | metabolism | 3.7  |
| pcx            | Pyruvate carboxylase                                            | Metabolism | 3.8  |
| nnmt           | nicotinamide N-methyltransferase                                | Metabolism | 4    |
| qscn6          | Quiescin Q6                                                     | metabolism | 4.2  |
| txnip          | Thioredoxin interacting protein                                 | Metabolism | 4.7  |
| adfp           | adipose differentiation related protein                         | Metabolism | 5    |
| sds            | Serine dehydratase                                              | Metabolism | 5.2  |
| pnp            | purine nucleoside phosphorylase (Np-b)                          | Metabolism | 5.5  |
| apobec1        | Apolipoprotein B editing complex 1                              | Metabolism | 6    |
| uck2           | Uridine-cytidine kinase 2                                       | Metabolism | 6.3  |
| sat            | Spermidine/spermine N1-acetyl transferase                       | Metabolism | 7.2  |
| xdh            | xanthine dehydrogenase                                          | Metabolism | 10   |
| apoa4          | apolipoprotein A-IV                                             | Metabolism | 15   |
| lce            | Long chain fatty acyl elongase                                  | Metabolism | D    |
| ddc            | Dopa decarboxylase                                              | Metabolism | D    |
| indo           | Indoleamine-pyrrole 2,3 dioxygenase                             | Metabolism | D    |
| g6pc           | glucose-6-phosphatase                                           | Metabolism | D    |
| car5a          | Carbonic anhydrase 5a                                           | Metabolism | D    |
| car14          | carbonic anhydrase                                              | Metabolism | D    |
| amy2           | pancreatic alpha-amylase isozyme (aa 1-508)                     | Metabolism | D    |
| cyp26a1        | Cytochrome P450, 26, retinoic acid A1                           | Metabolism | D    |
| mpdu1          | mannose-P-dolichol utilization defect 1                         | Metabolism | D    |
| hsd3b5         | 3-beta-hydroxysteroid dehydrogenase; 3-hydroxysteroid; ketoster | Metabolism | D    |
| rdh6           | CRAD1; cis-retinol/3alpha-hydroxysterol short-chain dehydrogena | Metabolism | D    |



|          |                                                                              |                     |      |
|----------|------------------------------------------------------------------------------|---------------------|------|
| hsd3b2   | Hydroxysteroid dehydrogenase-2, delta<5>-3-beta                              | Metabolism          | D    |
| lp1      | Lipoprotein lipase                                                           | Metabolism          | D    |
| gpat     | glycerol-3-phosphate acyltransferase gene, nuclear gene encoding             | Metabolism          | D    |
| acp6     | Acid phosphatase 6, lysophosphatidic                                         | Metabolism          | D    |
| cbr1     | carbonyl reductase (Cbr1)                                                    | Metabolism          | D    |
| cry1     | Cryptochrome 1 (photolyase-like)                                             | Metabolism          | D    |
| sptlc2   | Serine palmitoyltransferase, long chain base subunit 2                       | Metabolism          | I    |
| fmo3     | Flavin containing monooxygenase 3                                            | Metabolism          | I    |
| gpx3     | Glutathione peroxidase 3                                                     | Metabolism          | I    |
| sth2     | sulfotransferase, hydroxysteroid preferring 2                                | Metabolism          | I    |
| senp3    | Sentrin/SUMO-specific protease                                               | Protein degradation | 0.54 |
| psmb5    | Proteasome (prosome, macropain) subunit, beta type 5                         | Protein degradation | 0.57 |
| ctsd     | Cathepsin D                                                                  | Protein degradation | 0.7  |
| psmd8    | proteasome 26S subunit, non-ATPase, 8                                        | Protein degradation | 1.2  |
| psma2    | proteasome subunit, alpha type 2                                             | Protein degradation | 1.5  |
| uble1    | ubiquitin-like 1 activating enzyme E1B                                       | Protein degradation | 1.5  |
| psmc3    | proteasome (prosome, macropain) 26S subunit, ATPase 3                        | Protein degradation | 2    |
| nedd4b   | Neural precursor cell expressed, developmentally down-regulated 4            | Protein degradation | 5.8  |
| psmb9    | proteasome subunit, beta type 9                                              | Protein degradation | 13.5 |
| dnajc8   | DnaJ (Hsp40) homolog, subfamily C, member 8                                  | Protein folding     | 0.7  |
| dnajc1   | DnaJ (Hsp40) homolog, subfamily C, member 1                                  | Protein folding     | 0.56 |
| hsp105   | Heat shock protein, 105kDa                                                   | Protein folding     | 0.3  |
| rps25    | Ribosomal protein S25                                                        | Translation         | 0.29 |
| mrpl17   | Mitochondrial ribosomal protein L17                                          | Translation         | 0.32 |
| rpl36    | Ribosomal protein L36                                                        | Translation         | 0.5  |
| rpl28    | Ribosomal protein L28                                                        | Translation         | 0.7  |
| Snrpa1   | U2 small nuclear ribonucleoprotein polypeptide A'                            | Transcription       | 1.1  |
| rpl10    | ribosomal protein 10                                                         | Translation         | 1.1  |
| nc1      | nucleolin                                                                    | Translation         | 2    |
| D87691   | eukaryotic translation termination factor 1                                  | Translation         | 2.4  |
| hnrpa1   | heterogeneous nuclear ribonucleoprotein A1                                   | Transcription       | 2.7  |
| wars     | Tryptophanyl-tRNA synthetase                                                 | Translation         | 3    |
| wars     | tryptophanyl-tRNA synthetase                                                 | Translation         | 3.9  |
| gtf2a2   | General transcription factor II A, 2 (12kD subunit)                          | Transcription       | 4.6  |
| eif1a    | Eukaryotic translation initiation factor 1A                                  | Translation         | 5.4  |
| cpsf3    | Cleavage and polyadenylation specificity factor 3                            | Transcription       | D    |
| tcea3    | Transcription elongation factor A (SII), 3                                   | Transcription       | D    |
| mrp133   | mitochondrial ribosomal protein L33                                          | Translation         | D    |
| aqp9     | Aquaporin 9                                                                  | Transport           | 0.15 |
| slc2a2   | Solute carrier family 2 (facilitated glucose transporter), member 2          | Transport           | 0.15 |
| shbg     | Sex hormone binding globulin                                                 | Transport           | 0.16 |
| pr       | Voltage-dependent calcium channel gamma subunit-like protein                 | Transport           | 0.16 |
| slc10a1  | Solute carrier family 10 (sodium/bile acid cotransporter family), member 1   | Transport           | 0.2  |
| slc10a1  | Solute carrier family 10 (sodium/bile acid cotransporter family)             | Transport           | 0.2  |
| aqp8     | aquaporin 8                                                                  | Transport           | 0.24 |
| acatn    | Acetyl-Coenzyme A transporter                                                | Transport           | 0.26 |
| vdac2    | Voltage-dependent anion channel 2                                            | Transport           | 0.3  |
| npc1     | Niemann Pick type C1                                                         | Transport           | 0.35 |
| pgy2     | P glycoprotein 2                                                             | Transport           | 0.4  |
| slc16a2  | solute carrier family 16 (monocarboxylic acid transporters), member 2        | Transport           | 0.4  |
| slc25a20 | Solute carrier family 25 (mitochondrial carnitine/acylcarnitine transporter) | Transport           | 0.42 |
| slc25a15 | Solute carrier family 25 (mitochondrial carrier; ornithine transporter)      | Transport           | 0.45 |
| vdac3    | Voltage-dependent anion channel 3                                            | Transport           | 0.5  |

|          |                                                                       |           |      |
|----------|-----------------------------------------------------------------------|-----------|------|
| hiat1    | Hippocampus abundant gene transcript 1                                | Transport | 0.54 |
| atp5c1   | ATP synthase, H <sup>+</sup> transporting, mitochondrial F1 complex   | Transport | 0.56 |
| hbb-b1   | Hemoglobin                                                            | Transport | 0.65 |
| atp6a1   | ATPase, H <sup>+</sup> transporting, lysosomal (vacuolar proton pump) | Transport | 1.5  |
| atp1b3   | Na <sup>+</sup> ,K <sup>+</sup> -ATPase beta 3 subunit                | Transport | 2    |
| cp       | ceruloplasmin, multi-copper oxidase                                   | Transport | 2.5  |
| slc25a4  | Solute carrier family 25 (mitochondrial carrier; adenine nucleotide   | Transport | 3.5  |
| slc11a2  | Solute carrier family 11 (proton-coupled divalent metal ion transp    | Transport | 4    |
| clic4    | Chloride intracellular channel 4 (mitochondrial)                      | Transport | 4.2  |
| clic4    | Chloride intracellular channel 4 (mitochondrial)                      | Transport | 4.4  |
| slc9a3r1 | solute carrier family 9 (sodium/hydrogen exchanger), isoform 3 re     | Transport | 4.5  |
| clic4    | Chloride intracellular channel 4 (mitochondrial)                      | Transport | 8.1  |
| mvp      | Major vault protein                                                   | Transport | 25   |
| slc16a7  | Solute carrier family 16 (monocarboxylic acid transporters)           | Transport | D    |
| clcn3    | chloride channel 3                                                    | Transport | D    |
| rbp1     | cellular retinol binding protein I (mCRBPI).                          | Transport | D    |

\* D = absent after LPS treatment, present in untreated controls;

I = present after LPS treatment; absent in controls.
